# Supplementary material for: Gender Disparities in Lipid Goal Attainment among Type 2 Diabetes Outpatients with Coronary Heart Disease: Results from the CCMR-3B Study
Source: PubMed Central journal article supplement (PMC5627285; doi:10.1038/s41598-017-13066-z), 2017-10-04
Supplement: 41598_2017_13066_MOESM1_ESM.pdf [file 41598_2017_13066_MOESM1_ESM.pdf]

# **Gender Disparities in Lipid Goal Attainment among Type 2 Diabetes Outpatients with Coronary Heart Disease: Results from the CCMR-3B Study**

**Xiaomei Zhang<sup>1</sup>, Linong Ji<sup>2,\*</sup>, Xingwu Ran<sup>3</sup>, Benli Su<sup>4</sup>, Qiuhe Ji<sup>5</sup>, and Dayi Hu<sup>6</sup>**

<sup>1</sup>Peking University International Hospital, Department of Endocrinology and Metabolism, Beijing, 102206, China

<sup>2</sup>Peking University People's Hospital, Department of Endocrinology and Metabolism, Beijing, 100044, China

<sup>3</sup>West China Hospital, Sichuan University, Department of Endocrinology and Metabolism, Chengdu, 610041, China

<sup>4</sup>The Second Affiliated Hospital of Dalian Medical University, Department of Endocrinology, Dalian, 116027, China

<sup>5</sup>Xijing Hospital, Forth Military Medical University, Department of Endocrinology, Xi'an, 710032, China

<sup>6</sup>Peking University People's Hospital, Department of Cardiology, Beijing, 100044, China

\*jiln@bjmu.edu.cn

## Supplementary information

1. Supplementary Table 1: Patients distribution and social-economic status
2. Supplementary Table 2: Anti-diabetes and Anti-hypertension treatment in patients
3. **Supplementary Table 3: Lipid profile in Lipid lowering treated and not treated patients.**
4. Appendix 1: Investigators List

**Supplementary Table 1. Patients distribution and social-economic status**

|                                     | Men (N=1721) | Women (N=2072) |
|-------------------------------------|--------------|----------------|
| <b>Regions</b>                      |              |                |
| North                               | 17.1% (295)  | 17.7% (366)    |
| Northeast                           | 15.9% (273)  | 16.5% (341)    |
| East                                | 22.1% (380)  | 15.6% (324)    |
| South                               | 9.6% (165)   | 15.3% (318)    |
| Northwest                           | 14.8% (255)  | 16.1% (333)    |
| Southwest                           | 20.5% (353)  | 18.8% (390)    |
| <b>Hospital Tiers</b>               |              |                |
| Tier 1                              | 26.8% (462)  | 26.3% (544)    |
| Tier 2                              | 34.6% (595)  | 36.9% (765)    |
| Tier 3                              | 38.6% (664)  | 36.8% (763)    |
| <b>Department</b>                   |              |                |
| Cardiology                          | 14.5% (250)  | 12.1% (251)    |
| Endocrinology                       | 46.0% (791)  | 47.9% (992)    |
| Nephrology                          | 6.2% (107)   | 6.4% (133)     |
| Internal Medicine                   | 33.3% (573)  | 33.6% (696)    |
| <b>Residence</b>                    |              |                |
| Urban                               | 95.1% (1637) | 93.1% (1929)   |
| rural                               | 4.9% (84)    | 6.9% (143)     |
| <b>Education</b>                    |              |                |
| Illiterate                          | 2.5% (43)    | 11.3% (234)    |
| Primary School                      | 16.3% (281)  | 29.4% (609)    |
| Middle School                       | 48.5% (835)  | 44.2% (916)    |
| College                             | 18.9% (325)  | 10.8% (224)    |
| Postgraduate                        | 13.8% (237)  | 4.3% (89)      |
| <b>Employment</b>                   |              |                |
| Unemployed                          | 4.8% (82)    | 13.3% (276)    |
| Full-time Job                       | 14.3% (246)  | 2.2% (46)      |
| Part-time Job                       | 2.6% (44)    | 0.7% (14)      |
| Retired                             | 78.4% (1349) | 83.8% (1736)   |
| <b>Medical Insurance covered</b>    |              |                |
| No                                  | 4.5% (78)    | 4.7% (98)      |
| Yes                                 | 95.5% (1643) | 95.3% (1974)   |
| <b>Home Revenue (RMB per month)</b> |              |                |
| <2000                               | 30.3% (521)  | 43.6% (903)    |
| 2000-5000                           | 52.4% (902)  | 45.1% (934)    |
| >5000                               | 14.2% (244)  | 7.4% (153)     |
| Unknown                             | 3.1% (54)    | 4.0% (82)      |

Data are shown as % (n).

**Supplementary Table 2. Anti-diabetes and Anti-hypertension treatment in patients**

|                                                  | Men              | Women            |
|--------------------------------------------------|------------------|------------------|
| Anti-diabetes Agents                             |                  |                  |
| Metformin                                        | 42.1% (725/1721) | 35.0% (725/2072) |
| Sulfonylureas                                    | 23.4% (403/1721) | 30.3% (628/2072) |
| $\alpha$ -glucosidase inhibitor                  | 28.6% (492/1721) | 27.0% (559/2072) |
| Thiazolidinedione                                | 3.0% (52/1721)   | 8.1% (167/2072)  |
| Meglitinides                                     | 7.3% (126/1721)  | 4.4% (91/2072)   |
| Others                                           | 1.0% (17/1721)   | 1.2% (24/2072)   |
| Anti-hypertensive drugs in hypertension patients |                  |                  |
| Diuretics                                        | 3.0% (39/1302)   | 4.2% (71/1679)   |
| $\beta$ -blocker                                 | 16.2% (211/1302) | 8.2% (138/1679)  |
| Calcium Channel Blockers                         | 38.4% (500/1302) | 41.3% (693/1679) |
| ACE Inhibitor                                    | 11.8% (154/1302) | 15.2% (255/1679) |
| Angiotensin II Receptor Antagonist               | 22.8% (297/1302) | 30.5% (512/1679) |
| $\alpha$ -blockers                               | 2.7% (35/1302)   | 8.1% (136/1679)  |

Data are shown as % (n/N).

**S3 Table.** Lipid profile in Lipid lowering treated and not treated patients.

|       | Treated   |           |          | Not Treated |           |          |
|-------|-----------|-----------|----------|-------------|-----------|----------|
|       | Women     | Man       | <i>p</i> | Women       | Men       | <i>p</i> |
| TC    | 4.89±1.29 | 4.32±1.40 | <0.001   | 5.04±1.28   | 4.58±1.21 | <0.001   |
| LDL-C | 2.77±0.99 | 2.45±0.93 | <0.001   | 2.84±0.90   | 2.62±0.86 | <0.001   |
| HDL-C | 1.25±0.41 | 1.11±0.38 | <0.001   | 1.35±0.59   | 1.23±0.51 | <0.001   |
| TG    | 2.05±1.54 | 1.84±1.52 | 0.005    | 1.99±1.57   | 1.72±1.54 | <0.001   |

# Appendix 1

## Investigators List (by hospital)

1. Peking University People's Hospital  
*Zhun Sui, Mei Wang, Yingli Chen, Rongjing Ding, Dayi Hu, Linong Ji*
2. Beijing Hospital, Ministry of Health  
*Lixin Guo, Qi Pan, Hua Wu*
3. Xuanwu Hospital Capital Medical University  
*Huili Chen, Haixia Hou, Qi Hua, Yanling Wang*
4. Anzhen Hospital Capital Medical University  
*Hong Chen, Xin Du, Changsheng Ma, Hong Tao*
5. Peking University First Hospital  
*Yong Huo*
6. Peking Union Medical College Hospital  
*Yuxiu Li, Zengyi Li, Xiaoping Xing*
7. China-Japan Friendship Hospital  
*Yanyan Chen, Guangwei Li, Wenge Li, Xiaoxia Shen*
8. The General Hospital of the People's Liberation Army  
*Nan Jin, Jing Li, Yiming Mu, Changyu Pan*
9. Beijing Shi Jing Shan Hospital  
*Guogang Li, Weihua Li, Shanshan Lin, Changyang Su, Mingsheng Wang*
10. China Meitan General Hospital  
*Hongmei Li, Zhenwei Shi*
11. Huguoshi Chinese Medicine Hospital Beijing University of Chinese Medicine  
*Jian Huang, Bei Yang*

12. Daxing Chinese Medicine Hospital Beijing University of Chinese Medicine  
*Li Ma, Jie Zhang*
13. Beijing Pinggu Hospital  
*Yufeng Li, Cuiling Zhao*
14. Nanyuan Hospital  
*Kaijie Yang, Jixia Zhao*
15. Shichahai Community Health Service of Xichen District Beijing  
*Junqing Liu*
16. Beijing University of Posts and Telecommunications Community Health Service  
Center  
*Xiaoyan Wang*
17. Puhuangyu Community Health Service Center of Beijing  
*Yan Zhang*
18. Beijing Jiaotong University Hospital  
*Manhong Li*
19. The Second Affiliated Hospital of Dalian Medical University  
*Zhuo Li, Benli Su, Jiuyang Zhao, Lin Zhao*
20. Shenyang No. 4 People's Hospital  
*Yanhe Cui, Jinsong Kuang, Man Li, Yinjun Li, Weiguang Luo*
21. Affiliated Zhongshan Hospital of Dalian University  
*Shaokui Liu, Xiaomei Wang*
22. Second Affiliated Hospital of Jilin University  
*Bin Liu, Yu Liu, Lijuan Wang*

23. Liaoning Power Center Hospital  
*Mingyu Gao*
24. The Fourth Affiliated Hospital of Chinese Medicine University  
*Zhiying Duan, Hongmei Ji, Yuanzhe Jin, Zongqian Wang*
25. Dalian Lvshunou People's Hospital  
*Lu Chen, Danqi Wu, Shumin Yang*
26. Dalian Fifth People's Hospital  
*Xingjia Liu, Mingrui Lv, Yili Ma, Li Wang, Rui Yu*
27. Diabetes Treatment Center Of Liaoning Province  
*Bin Gao*
28. China–Japan Union Hospital and The First Affiliated Hospital of JILIN University  
*Feng Liu, Qing Wang, Dongyan Xu, Ping Yang*
29. Changchun People's Hospital  
*Pin Fu, Kaiping Mu*
30. Changchun Chaoyang District People's Hospital  
*Ruijie Meng, Yu Zhao*
31. Dalian ShaHeKou XingHaiWan Garden Community Health Service Center  
*Tinggui Gao, Yunshun Li*
32. Dalian ShaHeKou HeiShiJiao baiyun Community Health Service Center  
*Shuqin Bao*
33. Shenyang HuangGuOu Longjiang Community Health Service Center  
*Xia Cao*
34. Tiexiqu WeiGong Community Health Service Center  
*Xianying Liu, Jianbo Zhao, Shenyang*



35. Xijing Hospital  
*Qiuhe Ji*
36. Chinese PLA 323 Hospital  
*Peijun Mao, Jixian Ye*
37. Chinese PLA 451 Hospital  
*Dafang Wu, Yan Zhou*
38. The Second Hospital of Lanzhou University  
*Jiangong Ren*
39. Gansu Provincial Hospital  
*Jin Liu*
40. Xinjiao People's Hospital of Haizhu District Guangzhou  
*Zhaoqi He, Zhen Que*
41. Red Cross Hospital of Haizhu District Guangzhou  
*Liping Li, Zhizhao Zhou*
42. Hulin Street Community Health Service Center of Liwan District Guangzhou  
*Yi Lin, Xiangmin Xu*
43. Hongshan Street Community Health Service Center of Kaifu District Changsha  
*Cuiwei Zheng*
44. West China School of Medicine Sichuan University  
*Dawei Chen, Ping Fu, Xing Kang, Fang Liu, Xingwu Ran*
45. Second people's hospital of Chengdu  
*Xiaoyun Chen, Bing Huang, Qiu Li, Xiance Luo*
46. First People's Hospital Of Chengdu  
*Jie Gao, Zheng Li, Zhiming Lu, Yahui Yan*

47. Xinqiao Hospital of Third Military Medical University  
*Zihui Xu, Houdi Zhou*
48. The First affiliated Hospital of Chongqing Medical University  
*Han Lei, Qifu Li, Changhong Zhao*
49. The Second affiliated Hospital of Chongqing Medical University  
*Yan Cheng, Changhui Guo, Shiguo Tang, Yanping Xu, Gangyi Yang, Yuehui Yang*
50. Hospital of Tradition Medicine LS.SC  
*Kang Peng, Fenyuan Wu*
51. Hospital of Tradition Medicine MS.SC  
*YangHong Wang*
52. Sixth People's Hospital Of Chengdu  
*Yu Wang*
53. Fudan University Huashan Hospital  
*Jing Chen, Chuanming Hao, Rengming Hu, Yun Li, WeiLing Qi, Haiming Shi,  
Chaoyun Zhang*
54. The First Affiliated Hospital of Shanghai JiaoTong University  
*Yun Jiang, Shaowen Liu, Yongde Peng, Wei Wang, Weijie Yuan, Qing Yu*
55. Huadong Hospital Affiliated of Fudan University  
*Lei Cai, Jiao Sun*
56. Shanghai Changzheng Hospital  
*Ru Ding, Zhimin Liu, ChangLin Mei, Suxing Tuo, Zonggui Wu, Bei Zhang*
57. Tongji University affiliated Tenth People's Hospital  
*Ai Peng, Shen Qu, Yaxiang Song, Yidong Wei, Yawei Xu, Peng Yang*
58. Jiangsu province hospital

*Tao Yang, Qingxin Yuan*

59. Shanghai Post and Telecommunications Hospital

*Yi Xin*

60. Shanghai Pudong New Area public Hospital

*Mingjun Gu, Meihua Guo, Lianyong Liu, Jun Lu, Jianping Qiu, XiaoLing Pi,*

*Xumin Shen*

61. Shanghai Central Hospital of Shanghai Changning District

*Shan Huang, Xiaohong Jiang*

62. Central Hospital of Shanghai Minxing District

*Chengjun Chen, Xia Chen, Xudong Xu, Jialin Yang, Dadong Zhang, Yu Zhang*

63. Shanghai Luwan District Central Hospital

*Ling Chen, Yuwei Huang, Hui Li, Qiang Lu, Hong Shao, Ying Shen, Jianrong*

*Zhao, Zhen Zhu*

64. Central Hospital of Shanghai Jingan District

*Jianrao Lu, Jun Wang, Xiu'e Zhao*

65. Central Hospital of Shanghai Songjiang District

*Xiujuan Zang, Lijuan Zhang*

66. Shanghai Yangpu District Yin hang Community Health Service Center

*Rong Li, Yumei Ma*

67. Shanghai Yangpu District Bridge Community Health Service Center

*Ming Cui, Yanhong Zhou*

68. Shanghai Jingan District community health service center in Jiangning

*Weifeng Chen, Tianhan Shen*

69. Shanghai Qingpu District Zhao Zhen Community Health Service Center

*Qing Gu, Meijuan Zhu*

70. Shanghai Minhang District Urban Community Health Service Center

*Hua Hang, Chunxiao He*

71. The Second People's Hospital Haizhu District Guangzhou

*Yonglian Xie, Jixuan Zhao, Minling Zhao*

72. The Second People's Hospital of Shanxi

*Wenli Liu, Lili Pa*

73. Liwan Hospital Guangzhou Medical University

*Hongbing Luo*

74. Workers' Hospital of Xi'an Aero-engine Group Co., Ltd.

*Yu'nan Jia*

75. Xi An Huxian Hospital

*Yun'an Wang*

76. Zhongshanmen Community Medical Service Center of Xincheng District of Xi'an

*Yipeng Hou, Bing Xia*

77. The Second Affiliated Hospital of Sun Yet-sun Hospital

*Guojuan Lao, Yan Li*

78. Xi An Hansengzhai Community Medical Service Center of Xincheng District

*Jiang Wu,*

79. Shangde Hospital of Xi'an

*Mingzhao Yang*

80. The Third Affiliated Hospital of Sun Yet-sun Hospital

*Ling Chen, Hongrong Deng, Ruimin Dong, Jin Li, Xun Liu, Tanqi Lou, Jianping*

*Weng, Longyi Zeng*

81. Xi An Hujiamiao Hospital of Xincheng District  
*Ji Li*
82. The First Affiliated Hospital of Sun Yet-sun Hospital  
*Ailing Chen, Yanbing Li*
83. General Hospital of Guangzhou Military Command of PLA  
*Aiming Deng, Jian Qiu, Junrong Tong, Lin Xu, Lili Ye, Xianyang Zhong*
84. Nanfang Hospital  
*Ying Cao, Xiaojing Hu, Yaoming Xue*
85. Xiangya Hospital Central-South University  
*Meng Jiang, Mingxiang Lei*
86. The Second Xangya Hospital Central-South University  
*Weili Tang, Yu Zhou, Zhiguang Zhou*
87. Bingong 521 Hospital Xi'an  
*Xudan Zhen*
88. Dongfeng Branch of the Second People's Hospital Yuexiu District Guangzhou  
*Xiangwei Chen*
89. Guangzhou Diabetes Hospital  
*Maolin Luo*
90. Finance & Trade Hospital of Hunan Province  
*Xiao Xiong, Liping Zhu*
91. Xi An Huashan Centre Hospital  
*Qinli Fan*
92. First People's Hospital Of Longquanyi District Of Chengdu  
*Lihua Liu, Li Zhong*

93. People's Hospital of Pi County  
*Tianhu Liu, Yumei Zhang*
94. Chongqing Tung Wah Hospital  
*Jinghui Lu*
95. Wuhou Community Health Service Center of Wuhou District of Chengdu  
*Lin Yang, Wenyi Yang*
96. West City Community Health Service Center of Xindu District of Chengdu  
*Liuli He, Xiaohua Wu*
97. Yuling Community Health Service Center of Wuhou District of Chengdu  
*Xilian Gao, Jing Jiang*
98. Southwest Computer Company Worker's Hospital of Chongqing  
*Yana Xu, Bo Zhang*
99. Yuxi Hospital of Chongqing  
*Rongping Tian, Xinjian Zhou*
100. General Hospital Of Chongqing Iron And Steel  
*Xiaochun Teng*
101. Sichuan Academy of Medical Sciences & Sichuan Provincial People's  
Hospital  
*Mingjing Bao, Pengqiu Li, Limei Li, Yichuan Wu, Yang Xuan, Yan Yang, Xuejun  
Zhang*
102. Third people's hospital Chengdu  
*Hui He, Jingyu Liu, Li Zhang*
103. Second People's Hospital Of Jiulongpo District Of Chongqing  
*Qiu Xu, Hongju Zhong*
